# Supplementary material for: Induced Pluripotent Stem Cell-Derived Neural Precursors Improve Memory, Synaptic and Pathological Abnormalities in a Mouse Model of Alzheimer’s Disease
Source: MDPI journal article supplement (doi:10.3390/cells10071802), 2021-07-16

## **SUPPLEMENTARY FIGURE LEGENDS**

**Supplementary Figure 1. Generation and characterization of iPSCs from adult mouse tail-tip fibroblasts (TTFs).** (a) Schematic representation of the experimental design to generate iPSCs. Mouse TTF were transduced one time (day 0 post transduced, 0 DPT) with four PMXs retroviral reprogramming plasmids (Addgene). Six DPT, mouse TTFs were collected and seeded with irradiated MEFs. Mouse TTFs medium was replaced with mouse ESCs medium every day. At 30 DPT, mouse ESC-like colonies were detached from the plate using a rounded tip glass Pasteur pipette, collected and disaggregated manually. (b) Morphology of established iPSC line miPSC-TTF1 at passage number 10. miPSC-TTF1 line was positive for alkaline phosphatase (c) and the pluripotent markers SSEA-1 (d), OCT4 (also known as *Pou5f1*) (d), E-cadherin (e) and SOX2 (e). Nuclei were stained with DAPI (blue). Scale bar (b,d,e): 25  $\mu$ m, (c): 50  $\mu$ m. (f) RT-PCR showed miPSC-TTF-1 and miPSC-TTF-2 lines expressed many undifferentiated ESC marker genes. (g-l) Pluripotency of iPSCs derived from adult TTFs *in vitro*. miPSC-TTF-1 colony was harvested by trypsinization and plated on low-attachment plates in the mouse ESC medium without LIF. After 3 days, aggregated cells (g) were transferred onto gelatin-coated tissue culture dishes and incubated for one week (h). Scale bar (g,h): 50  $\mu$ m. Cells were then fixed and incubated with anti- $\alpha$ -fetoprotein (AFP) (i), anti-brachyury (j) or anti-microtubule-associated protein 2 (MAP2) (k) antibodies. Signals were visualized with Alexa Fluor 488 secondary antibody. Nucleus were stained with DAPI. Scale bar (i-k): 50  $\mu$ m. (l) We performed RT-PCR with total RNA isolated from EB miPSC (EBmiPSC-TTF-1), EB mouse ESCs, mouse ESCs and MEFs. The expression of Brachyury (mesoderm marker), Gata6 (endoderm marker) and Map2 (ectoderm marker) were examined. Nat1 was used as a loading control.

**Supplementary Figure 2. Derivation and characterization of mouse iPSC-NPCs.** (a) iPSC-NPCs have elongated bipolar morphology, end-feet and oval nucleus. (b-e) iPSC-NPCs were positive for markers typically observed in authentic NPCs, including nestin, vimentin, musashi and Sox2. (f, g) Some iPSC-NPCs also express the neuron-restricted markers doublecortin (DCX) and MAP2, the astrocyte marker (GFAP) (h) and the oligodendrocyte marker (OLIG1) (i). (j) Pluripotent markers Oct4 and SSEA-1 were silenced in iPSC-NPCs. Scale bar (a-j): 25  $\mu$ m. (k) Flow cytometric analysis of iPSC-NPCs showing expression of Nestin, E-Cadherin, DCX, and GFAP, but not Oct4.

**Supplementary Figure 3. *In vitro* differentiation of iPSC-NPCs.** *In vitro* differentiation showed that iPSC-NPCs were able to generate neurons (a), astrocytes (b) and oligodendrocytes (c) after 3 weeks. Scale bar: 25  $\mu$ m

**Supplementary Figure 4. Induction of GFP expression in iPSC-NPCs.** iPSC-NPCs were transduced with rtTA and Dox-GFP lentivirus. iPSC-NPCs GFP<sup>+</sup> were then sorted using FACS and expanded. Isolated cells were cultured in the absence (a) or presence (b) of dox (1 g/ml) for 24 h. Dishes were photographed using a fluorescence microscope. Cll sortin studies showed that 98.75% of the cells were positive for GFP after dox treatment. Scale bar: 25  $\mu$ m

**Supplementary Table 1.** Primer sequences for mouse ESC genes

| Symbol          | Primer sequence 5' to 3'                   | Gene                           |
|-----------------|--------------------------------------------|--------------------------------|
| Ecat1-RT-S      | TGT GGG GCC CTG AAA GGC GAG CTG AGA T      | RT-PCR for Ecat1               |
| Ecat1-RT-AS     | ATG GGC CGC CAT ACG ACG ACG CTC AAC T      |                                |
| pH34-U38        | GAA GTC TGG TTC CTT GGC AGG ATG            | RT-PCR for Esg1                |
| pH34-L394       | ACT CGA TAC ACT GGC CTA GC                 |                                |
| 6047-S1         | CAG GTG TTT GAG GGT AGC TC                 | RT-PCR for endogenous Nanog    |
| 6047-AS1        | CGG TTC ATC ATG GTA CAG TC                 |                                |
| 45328-S118      | ACT GCC CCT CAT CAG ACT GCT ACT            | RT-PCR for ERas                |
| ERas-AS304      | CAC TGC CTT GTA CTC GGG TAG CTG            |                                |
| Gdf3-U253       | GTT CCA ACC TGT GCC TCG CGT CTT            | RT-PCR for Gdf3                |
| Gdf3-L16914     | AGC GAG GCA TGG AGA GAG CGG AGC AG         |                                |
| Oct3/4-S9       | TCT TTC CAC CAG GCC CCC GGC TC             | RT-PCR for endogenous Oct3/4   |
| Oct3/4-AS210    | TGC GGG CGG ACA TGG GGA GAT CC             |                                |
| Rex1-RT-S       | ACG AGT GGC AGT TTC TTC TTG GGA            | RT-PCR for Rex1                |
| Rex1-RT-AS      | TAT GAC TCA CTT CCA GGG GGC ACT            |                                |
| Utf1-RT-S       | GGA TGT CCC GGT GAC TAC GTC TG             | RT-PCR for Utf1                |
| Utf1-RT-AS      | GGC GGA TCT GGT TAT CGA AGG GT             |                                |
| Zfp296-S67      | CCA TTA GGG GCC ATC ATC GCT TTC            | RT-PCR for Zfp296              |
| Zfp296-AS350    | CAC TGC TCA CTG GAG GGG GCT TGC            |                                |
| Nat1-U283       | ATT CTT CGT TGT CAA GCC GCC AAA GTG GAG    | RT-PCR for Nat1                |
| Nat1-L476       | AGT TGT TTG CTG CGG AGT TGT CAT CTC GTC    |                                |
| Sox2-RT-S       | TAG AGC TAG ACT CCG GGC GAT GA             | RT-PCR for endogenous Sox2     |
| Sox2-RT-AS      | TTG CCT TAA ACA AGA CCA CGA AA             |                                |
| Klf4-S1236      | GCG AAC TCA CAC AGG CGA GAA ACC            | RT-PCR for endogenous Klf4     |
| Klf4cDNAas2547  | TCG CTT CCT CTT CCT CCG ACA CA             |                                |
| Myc-S1904       | TGA CCT AAC TCG AGG AGG AGC TGG AAT C      | RT-PCR for endogenous c-Myc    |
| Myc-AS2042      | AAG TTT GAG GCA GTT AAA ATT ATG GCT GAA GC |                                |
| Mtap2-S629      | CAT CGC CAG CCT CGG AAC AAA CAG            | RT-PCR for Map2                |
| Mtap2-AS867     | TGC GCA AAT GGA ACT GGA GGC AAC            |                                |
| T-S764          | ATG CCA AAG AAA GAA ACG AC                 | RT-PCR for Brachyury           |
| T-AS1579        | AGA GGC TGT AGA ACA TGA TT                 |                                |
| Gata6-S917      | ACC TTA TGG CGT AGA AAT GCT GAG GGT G      | RT-PCR for Gata6               |
| Gata6-AS1250    | CTG AAT ACT TGA GGT CAC TGT TCT CGG G      |                                |
| MeOct3/4-DMR-S  | GGT TTT TTA GAG GAT GGT TGA GTG            | Methylation analysis of Oct3/4 |
| MeOct3/4-DMR-AS | TCC AAC CCT ACT AAC CCA TCA CC             |                                |
| MeNanog-F2-S    | GAT TTT GTA GGT GGG ATT AAT TGT GAA TTT    | Methylation analysis of Nanog  |
| MeNanog-F2-AS   | ACC AAA AAA ACC CAC ACT CAT ATC AAT ATA    |                                |

# Supplementary Figure 1

**a**

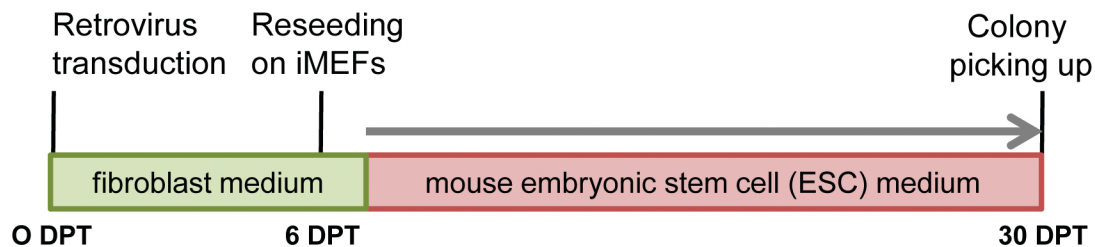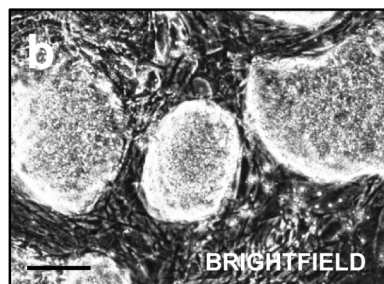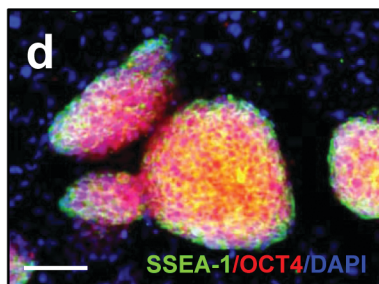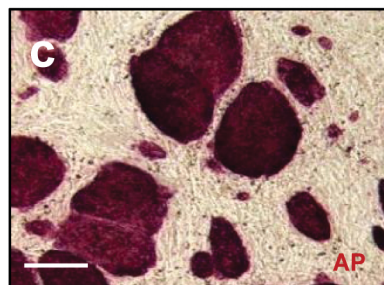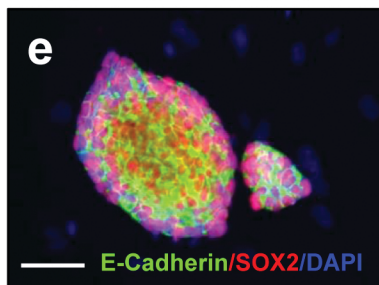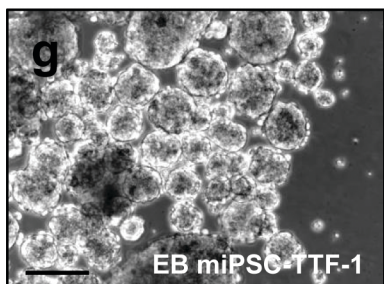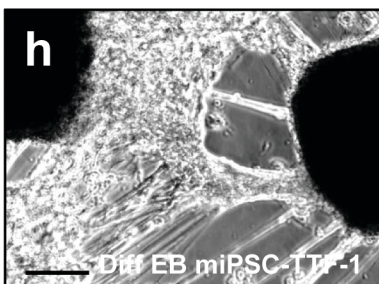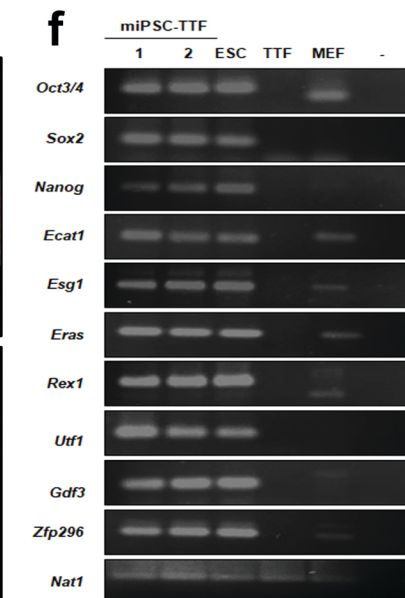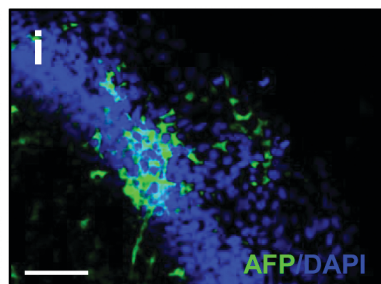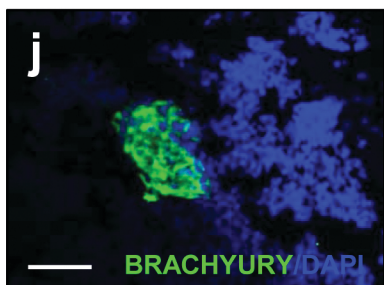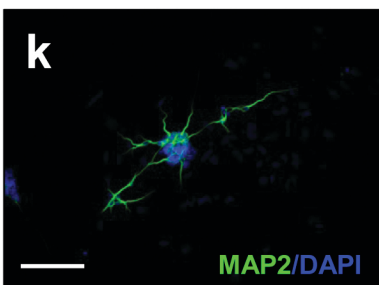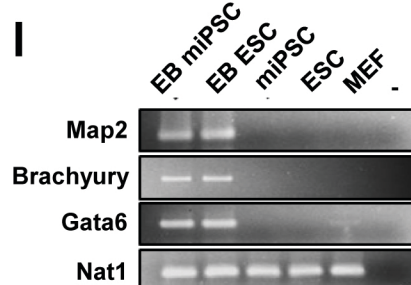



# Supplementary Figure 2

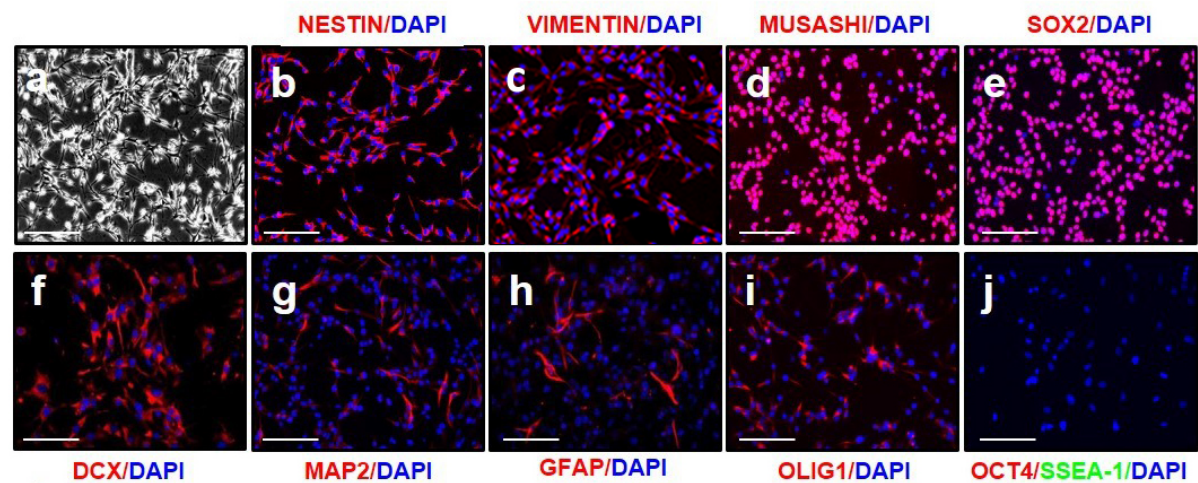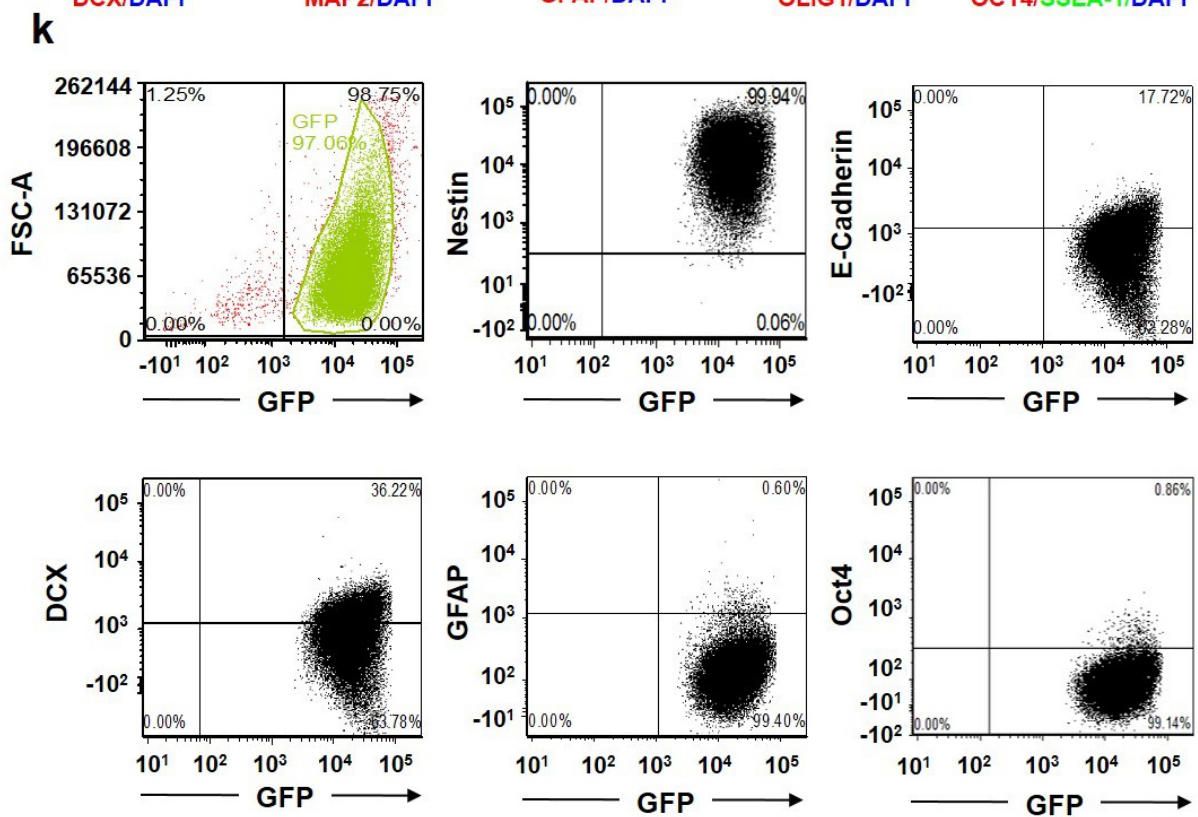

Supplementary Figure 3

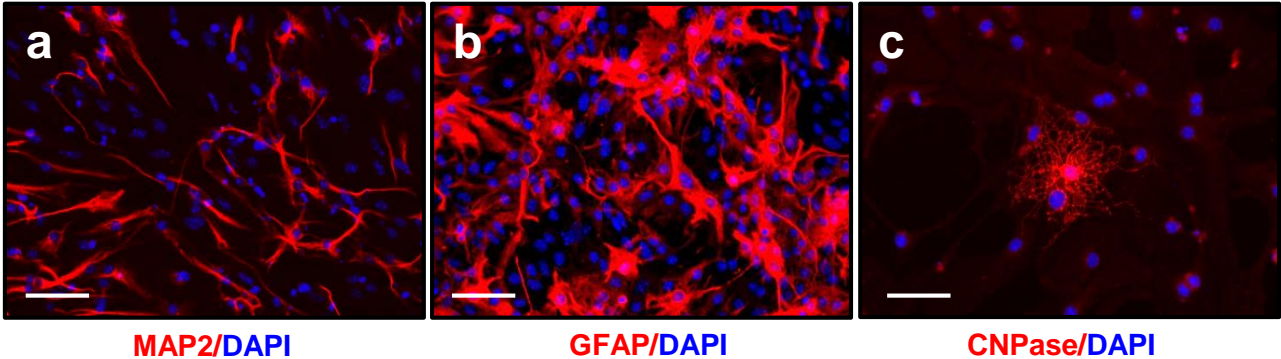

# Supplementary Figure 4

iPSC-NPCs Not Dox treated

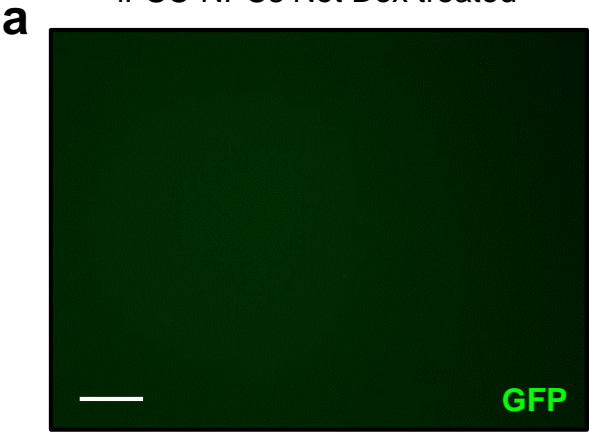

iPSC-NPCs Dox treated

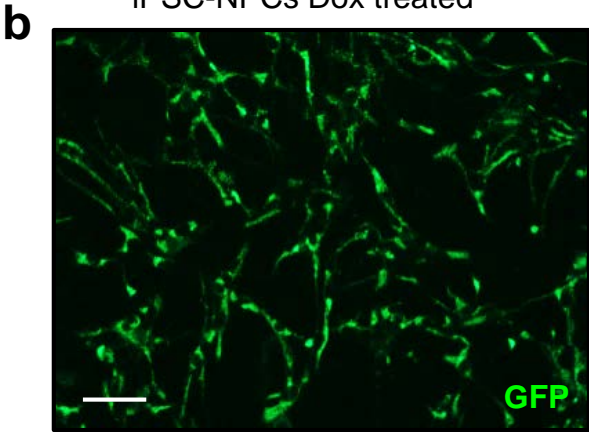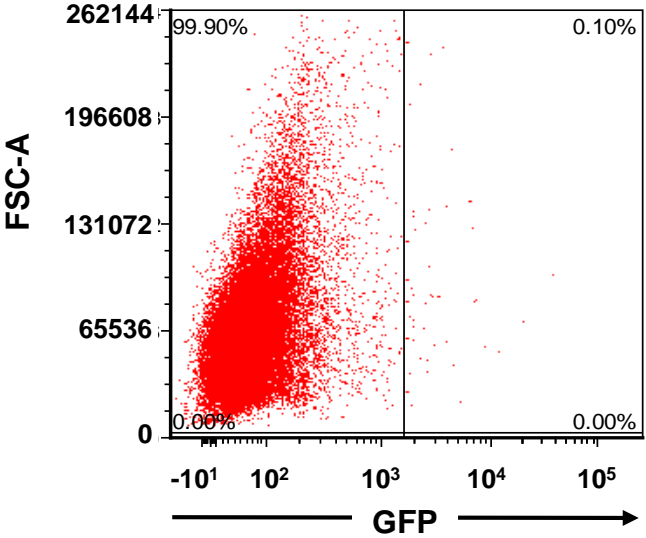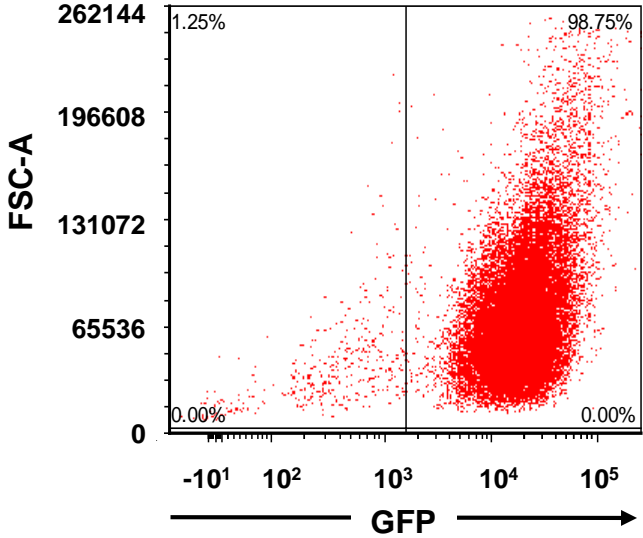

Supplement: s1 [file s1]
